# Supplementary material for: Neuronal network dysfunction in a model for Kleefstra syndrome mediated by enhanced NMDAR signaling
Source: PubMed Central journal article supplement (PMC6821803; doi:10.1038/s41467-019-12947-3), 2019-10-30
Supplement: 41467_2019_12947_MOESM3_ESM.pdf [file 41467_2019_12947_MOESM3_ESM.pdf]

## **Description of Additional Supplementary Files**

File Name: Supplementary Data 1

Description: Overview of all statistics. For each experiment the statistical test and exact P value is given.
